# Supplementary material for: Enhanced photocatalytic activity of a visible-light-driven ternary WO3/Ag/Ag3PO4 heterojunction: a discussion on electron transfer mechanisms
Source: Royal Society of Chemistry journal article supplement (doi:10.1039/d0ra01731k), 2020-01-01
Supplement: d0ra01731k1.pdf [file d0ra01731k1.pdf]

Supplemental information:

### Enhanced photocatalytic activity of visible-light-driven ternary $\text{WO}_3/\text{Ag}/\text{Ag}_3\text{PO}_4$ heterojunction: A discussion on electron transfer mechanism

Shengqi Zhang<sup>a</sup>, Tao Yu<sup>a</sup>, Hui Wen<sup>a</sup>, Rui Guo<sup>a,b,c\*</sup>, Juanjuan Xu<sup>a,b\*</sup>, Ruixia Zhong<sup>a,c\*</sup>, Xian Li<sup>a,c</sup>, Junhua You<sup>d</sup>

<sup>(a)</sup> School of Materials Science and Engineering, Northeastern University, Shenyang 110819)

<sup>(b)</sup> Key Laboratory of Advanced Energy Materials Chemistry (Ministry of Education), College of Chemistry, Nankai University, Tianjin 300071, China)

<sup>(c)</sup> School of Resources and Materials, Northeastern University at Qinhuangdao, 066004, China)

<sup>(d)</sup> School of Materials Science and Engineering, Shenyang University of Technology, Shenyang 110870, China)

\*Corresponding author: [guorui@neuq.edu.cn](mailto:guorui@neuq.edu.cn) ( Rui Guo), [1519931572@qq.com](mailto:1519931572@qq.com) (Juanjuan Xu), [46028914@qq.com](mailto:46028914@qq.com) ( Ruixia Zhong)

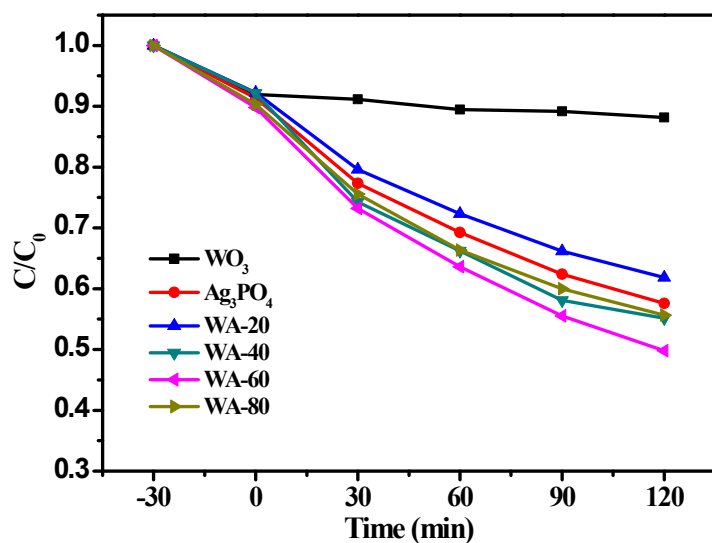

Fig. S1 The degradation of MB of  $\text{WO}_3$ ,  $\text{Ag}_3\text{PO}_4$  and WA-x.

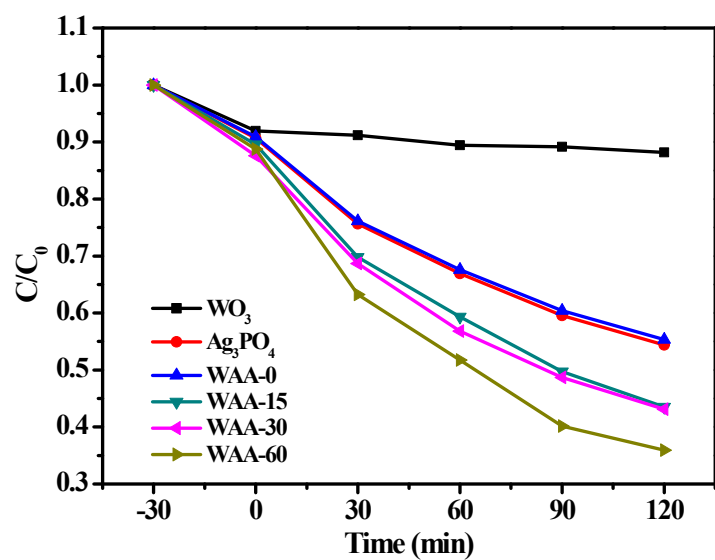

Fig. S2 The degradation of MB of  $WO_3$ ,  $Ag_3PO_4$  and WAA-x.
